# Supplementary material
Source: MDPI journal article supplement (https://www.mdpi.com/2311-7524/10/5/425)
Supplement: s1 [file s1]

Supplementary Tables

**Table S1.** Soil volumetric water content and irrigation in different treatments.

| Date | Soil volumetric water content (%) |      |      | Quantity of irrigation water (ml) |       |       |
|------|-----------------------------------|------|------|-----------------------------------|-------|-------|
|      | W1                                | W2   | W3   | W1                                | W2    | W3    |
| 6/18 | 19.7                              | 23.3 | 26.8 | 0.0                               | 0.0   | 0.0   |
| 6/19 | 18.7                              | 17.3 | 17.9 | 0.0                               | 0.0   | 0.0   |
| 6/20 | 15.7                              | 17.1 | 16.3 | 40.3                              | 0.0   | 0.0   |
| 6/21 | 19.7                              | 14.7 | 12.6 | 0.0                               | 0.0   | 0.0   |
| 6/22 | 15.2                              | 11.2 | 11   | 45.0                              | 110.6 | 0.0   |
| 6/23 | 20                                | 23   | 9.7  | 0.0                               | 0.0   | 162.2 |
| 6/24 | 14.3                              | 11.4 | 27   | 53.4                              | 108.8 | 0.0   |
| 6/25 | 20                                | 23.4 | 8.2  | 0.0                               | 0.0   | 176.3 |
| 6/26 | 14.3                              | 16   | 27.3 | 53.4                              | 0.0   | 0.0   |
| 6/27 | 19.2                              | 13.2 | 11.6 | 0.0                               | 91.9  | 144.4 |
| 6/28 | 14.8                              | 22.7 | 26.6 | 48.8                              | 0.0   | 0.0   |
| 6/29 | 19                                | 17.4 | 14.1 | 0.0                               | 0.0   | 120.9 |
| 6/30 | 15.6                              | 12.8 | 20.5 | 41.3                              | 95.6  | 0.0   |
| 7/1  | 17.5                              | 23   | 16   | 0.0                               | 0.0   | 0.0   |
| 7/2  | 11.6                              | 12.3 | 9.2  | 78.8                              | 100.3 | 166.9 |
| 7/3  | 13.9                              | 23.3 | 27.2 | 57.2                              | 0.0   | 0.0   |
| 7/4  | 16.3                              | 12.1 | 11.9 | 34.7                              | 102.2 | 0.0   |
| 7/5  | 15.7                              | 23   | 8.6  | 40.3                              | 0.0   | 172.5 |
| 7/6  | 12.6                              | 13.5 | 26.9 | 69.4                              | 89.1  | 0.0   |
| 7/7  | 17.6                              | 23.7 | 8.8  | 0.0                               | 0.0   | 170.6 |
| 7/8  | 15.4                              | 17.3 | 26.4 | 43.1                              | 0.0   | 0.0   |
| 7/9  | 15.2                              | 14   | 15.2 | 45.0                              | 84.4  | 0.0   |
| 7/10 | 16.2                              | 23   | 8.4  | 35.6                              | 0.0   | 174.4 |
| 7/11 | 15.8                              | 12.7 | 26.6 | 39.4                              | 96.6  | 0.0   |
| 7/12 | 16.9                              | 23.3 | 13.8 | 29.1                              | 0.0   | 0.0   |
| 7/13 | 17                                | 15.6 | 12.6 | 0.0                               | 0.0   | 0.0   |
| 7/14 | 15.5                              | 14.1 | 9.2  | 42.2                              | 83.4  | 166.9 |
| 7/15 | 18.3                              | 23.3 | 27.3 | 0.0                               | 0.0   | 0.0   |
| 7/16 | 16.6                              | 11.4 | 11.6 | 31.9                              | 108.8 | 0.0   |
| 7/17 | 14.8                              | 23   | 10.8 | 48.8                              | 0.0   | 0.0   |
| 7/18 | 20.2                              | 19.4 | 8.6  | 0.0                               | 0.0   | 172.5 |
| 7/19 | 13.4                              | 13.2 | 26.6 | 61.9                              | 0.0   | 0.0   |
| 7/20 | 16                                | 11.5 | 9.7  | 37.5                              | 107.8 | 162.2 |
| 7/21 | 20                                | 23.3 | 26.5 | 0.0                               | 0.0   | 0.0   |
| 7/22 | 16.3                              | 13.2 | 9    | 34.7                              | 0.0   | 168.8 |
| 7/23 | 20                                | 12.7 | 26.6 | 0.0                               | 96.6  | 0.0   |
| 7/24 | 13.6                              | 23.4 | 8.7  | 60.0                              | 0.0   | 171.6 |
| 7/25 | 20                                | 12.6 | 26.6 | 0.0                               | 97.5  | 0.0   |
| 7/26 | 16.4                              | 23   | 12.8 | 33.8                              | 0.0   | 0.0   |

|      |      |      |      |      |       |       |
|------|------|------|------|------|-------|-------|
| 7/27 | 20   | 13.8 | 8.3  | 0.0  | 86.3  | 175.3 |
| 7/28 | 12.6 | 23   | 27   | 69.4 | 0.0   | 0.0   |
| 7/29 | 19.1 | 18.6 | 14   | 0.0  | 0.0   | 0.0   |
| 7/30 | 15.5 | 12.7 | 10.1 | 42.2 | 96.6  | 0.0   |
| 7/31 | 20   | 23   | 7    | 0.0  | 0.0   | 187.5 |
| 8/1  | 12.1 | 11   | 27   | 74.1 | 112.5 | 0.0   |
| 8/2  | 20   | 23.4 | 9    | 0.0  | 0.0   | 168.8 |
| 8/3  | 15.4 | 13   | 26.6 | 43.1 | 0.0   | 0.0   |
| 8/4  | 20.1 | 10.8 | 8.1  | 0.0  | 114.4 | 177.2 |
| 8/5  | 14.9 | 23.3 | 27.2 | 47.8 | 0.0   | 0.0   |
| 8/6  | 19.9 | 16.7 | 20   | 0.0  | 59.1  | 0.0   |
| 8/7  | 19.9 | 23.3 | 13.9 | 0.0  | 0.0   | 0.0   |
| 8/8  | 17.3 | 14.9 | 8.1  | 25.3 | 0.0   | 177.2 |
| 8/9  | 21.1 | 13   | 26.9 | 0.0  | 93.8  | 0.0   |
| 8/10 | 21.2 | 23.2 | 8.1  | 0.0  | 0.0   | 177.2 |
| 8/11 | 15.2 | 11   | 26.5 | 45.0 | 0.0   | 0.0   |
| 8/12 | 20.2 | 10.3 | 7.5  | 0.0  | 119.1 | 182.8 |
| 8/13 | 16.6 | 23.4 | 27.1 | 31.9 | 0.0   | 0.0   |
| 8/14 | 21.1 | 17   | 13.5 | 0.0  | 56.3  | 0.0   |
| 8/15 | 20.6 | 22.8 | 9    | 0.0  | 0.0   | 168.8 |
| 8/16 | 17.8 | 21.1 | 27   | 20.6 | 0.0   | 0.0   |
| 8/17 | 19.8 | 13   | 8.9  | 0.0  | 93.8  | 169.7 |
| 8/18 | 18.5 | 23.4 | 27.3 | 0.0  | 0.0   | 0.0   |
| 8/19 | 15.1 | 12.9 | 13.6 | 45.9 | 94.7  | 0.0   |
| 8/20 | 20.1 | 23   | 9    | 0.0  | 0.0   | 168.8 |
| 8/21 | 14   | 13   | 27.4 | 56.3 | 93.8  | 0.0   |
| 8/22 | 16   | 22.4 | 8.5  | 37.5 | 0.0   | 173.4 |
| 8/23 | 15.5 | 17   | 27   | 42.2 | 0.0   | 0.0   |
| 8/24 | 18.4 | 13   | 15   | 0.0  | 93.8  | 0.0   |
| 8/25 | 16   | 23.3 | 8.9  | 37.5 | 0.0   | 169.7 |
| 8/26 | 19.9 | 13   | 26.6 | 0.0  | 93.8  | 0.0   |
| 8/27 | 15.4 | 22.8 | 13.2 | 43.1 | 0.0   | 0.0   |
| 8/28 | 20   | 17.6 | 8.6  | 0.0  | 0.0   | 172.5 |
| 8/29 | 16.1 | 12.9 | 27.5 | 36.6 | 94.7  | 0.0   |
| 8/30 | 20   | 23.4 | 16   | 0.0  | 0.0   | 0.0   |
| 8/31 | 17.6 | 13   | 9    | 0.0  | 93.8  | 168.8 |
| 9/1  | 16.1 | 22.8 | 27   | 36.6 | 0.0   | 0.0   |
| 9/2  | 19.9 | 16   | 8.6  | 0.0  | 0.0   | 172.5 |
| 9/3  | 16.3 | 13.1 | 26.5 | 34.7 | 92.8  | 0.0   |
| 9/4  | 20   | 23.1 | 15   | 0.0  | 0.0   | 0.0   |
| 9/5  | 15.1 | 12.1 | 8.9  | 45.9 | 102.2 | 169.7 |
| 9/6  | 20   | 23.4 | 27   | 0.0  | 0.0   | 0.0   |
| 9/7  | 16.4 | 13   | 11   | 33.8 | 93.8  | 0.0   |
| 9/8  | 20.3 | 23   | 9    | 0.0  | 0.0   | 168.8 |

|      |      |      |      |      |       |       |
|------|------|------|------|------|-------|-------|
| 9/9  | 17.3 | 18.5 | 27.2 | 25.3 | 42.2  | 0.0   |
| 9/10 | 20   | 23   | 9.8  | 0.0  | 0.0   | 161.3 |
| 9/11 | 15.6 | 16   | 26.5 | 41.3 | 0.0   | 0.0   |
| 9/12 | 20   | 12.3 | 13   | 0.0  | 100.3 | 0.0   |
| 9/13 | 18   | 22.8 | 8.4  | 18.8 | 0.0   | 174.4 |
| 9/14 | 20.1 | 13.9 | 26.1 | 0.0  | 85.3  | 0.0   |
| 9/15 | 19.3 | 23.1 | 13   | 0.0  | 0.0   | 0.0   |
| 9/16 | 15.8 | 14   | 8.9  | 39.4 | 0.0   | 169.7 |

**Table S2.** Effects of SMF and N application treatments on the number of fallen leaves of okra.

| Treatment      |                | Number of fallen leaves (piece) |
|----------------|----------------|---------------------------------|
| N <sub>0</sub> | W <sub>1</sub> | 15.3±0.94b                      |
|                | W <sub>2</sub> | 19.3±1.25a                      |
|                | W <sub>3</sub> | 14.0±1.41bc                     |
| N <sub>1</sub> | W <sub>1</sub> | 9.3±0.94d                       |
|                | W <sub>2</sub> | 12.0±1.63bcd                    |
|                | W <sub>3</sub> | 10.7±0.94cd                     |
| N <sub>2</sub> | W <sub>1</sub> | 13.3±2.36bcd                    |
|                | W <sub>2</sub> | 21.7±3.40a                      |
|                | W <sub>3</sub> | 13.7±1.70bc                     |

Note: The data in the table are the mean ± standard deviation of the observed values. The different lowercase letters after the same number represent the significant difference between the treatments at 0.05 level.
